# Supplementary material for: IL-4 Augments IL-31/IL-31 Receptor Alpha Interaction Leading to Enhanced Ccl 17 and Ccl 22 Production in Dendritic Cells: Implications for Atopic Dermatitis
Source: PubMed Central journal article supplement (PMC6719908; doi:10.3390/ijms20164053), 2019-08-20
Supplement: ijms-20-04053-s001.pdf [file ijms-20-04053-s001.pdf]

**a**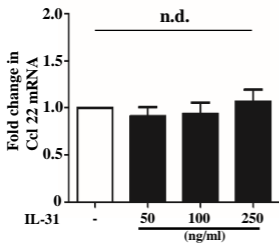**b**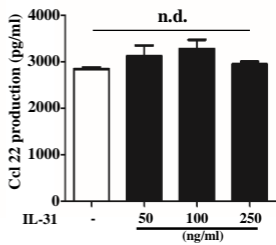

**【Supplemental Figure 1】**
